# Supplementary material for: Macrophage-Derived Factors with the Potential to Contribute to Pathogenicity of HIV-1 and HIV-2: Role of CCL-2/MCP-1
Source: MDPI journal article supplement (doi:10.3390/v15112160), 2023-10-27
Supplement: s1 [file s1]

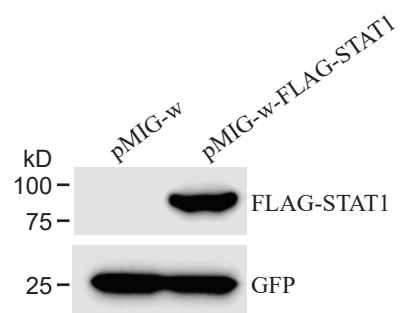

**Figure S1. Expression of STAT1 in the transfected 293T cells.** 293T cells were transfected with the empty pMIG-w or pMIG-w-FLAG-STAT1 plasmid. Cells were extracted 48 hours following the transfection. The expression of FLAG-STAT1 in the cell lysates was determined by Western blot using anti-FLAG antibody from Sigma (M2, Cata# F3165). GFP was used as a control for expression of the STAT1-IRES-GFP cassette.

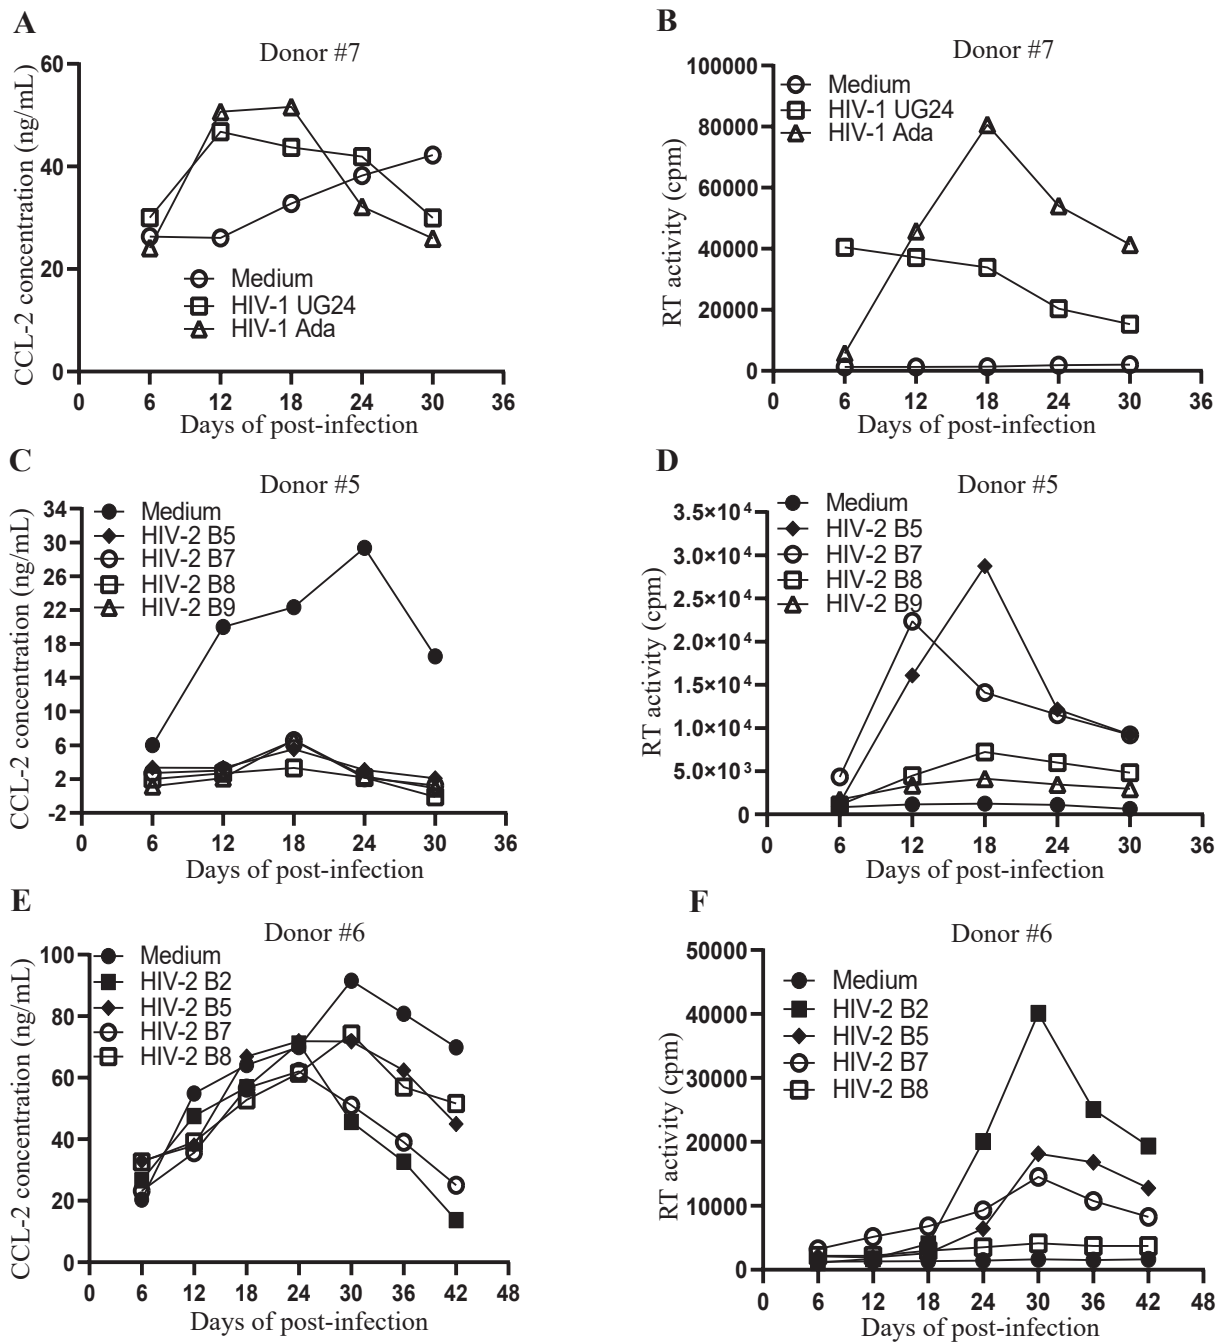

**Figure S2. Virus replication (B, D, F) and CCL2 expression (A, C, E) in MDM infected with HIV-2 (C- F) or HIV-1 (A, B) isolates.** MDM were differentiated from primary monocytes isolated from donors #5 (C, D), #6 (E, F) and #7 (A, B). The CCL2 expression levels of MDM following the infection were determined by ELISA at the indicated time points. Virus replication was monitored by measuring RT activity in the supernatant harvested at the indicated time points.

**Table S1.** Virus replication and CCL2 induction in MDM infected with HIV-1 isolates

| Donor #8 | HIV-1 UG24             |                          | HIV-1BCFO3 |             | HIV-1 Ada |             | HIV-1 Bal |             |
|----------|------------------------|--------------------------|------------|-------------|-----------|-------------|-----------|-------------|
|          | RT (fold) <sup>1</sup> | CCL2 (fold) <sup>1</sup> | RT (fold)  | CCL2 (fold) | RT (fold) | CCL2 (fold) | RT (fold) | CCL2 (fold) |
| Day 9    | 0.94                   | -0.31                    | 14.81      | 1.96        | 1.42      | 1.58        | 36.57     | 1.98        |
| Day 15   | 2.10                   | 0.06                     | 46.30      | 0.77        | 108.67    | 1.12        | 93.97     | 5.28        |
| Day 21   | 5.40                   | -0.42                    | 35.80      | 0.71        | 85.29     | 0.94        | 77.86     | 3.56        |
| Day 27   | 3.83                   | -0.71                    | 51.47      | -0.26       | 80.57     | 0.05        | 69.54     | 0.86        |
| Day 33   | 2.63                   | -0.70                    | 22.03      | -0.39       | 28.84     | -0.60       | 65.41     | 0.54        |

<sup>1</sup> Fold change was calculated using the formula: (RT/CCL2 of HIV-1-infected MDM – RT/CCL2 of uninfected MDM) ÷ (RT/CCL2 of uninfected MDM)

**Table S2.** Virus replication and CCL2 induction in MDM infected with HIV-1 isolates

| Donor #7 | HIV-1 UG24             |                          | HIV-1 Ada |             |
|----------|------------------------|--------------------------|-----------|-------------|
|          | RT (fold) <sup>1</sup> | CCL2 (fold) <sup>1</sup> | RT (fold) | CCL2 (fold) |
| Day 6    | 29.43                  | 0.14                     | 3.79      | -0.08       |
| Day 12   | 28.98                  | 0.80                     | 36.80     | 0.94        |
| Day 18   | 21.88                  | 0.34                     | 52.50     | 0.58        |
| Day 24   | 10.62                  | 0.10                     | 27.94     | -0.16       |
| Day 30   | 8.66                   | -0.29                    | 23.24     | -0.38       |

<sup>1</sup> Fold change was calculated using the formula: (RT/CCL2 of HIV-1-infected MDM – RT/CCL2 of uninfected MDM) ÷ (RT/CCL2 of uninfected MDM)

**Table S3.** Virus replication and CCL2 induction in MDM infected with HIV-2 isolates

| Donor #8 | HIV-2 B2               |                          | HIV-2 B3  |             | HIV-2 B4  |             | HIV-2 B5  |             | HIV-2 B7  |             | HIV-2 B8  |             | HIV-2 B9  |             |
|----------|------------------------|--------------------------|-----------|-------------|-----------|-------------|-----------|-------------|-----------|-------------|-----------|-------------|-----------|-------------|
|          | RT (fold) <sup>1</sup> | CCL2 (fold) <sup>1</sup> | RT (fold) | CCL2 (fold) |
| Day 9    | -0.16                  | -0.46                    | -0.01     | 0.12        | 0.63      | -0.39       | 0.14      | -0.44       | 0.17      | -0.43       | -0.25     | -0.76       | -0.04     | 0.54        |
| Day 15   | -0.29                  | -0.72                    | 0.79      | -0.59       | 9.23      | -0.78       | 14.41     | -0.73       | 2.04      | -0.90       | -0.32     | -1.00       | 0.13      | -0.56       |
| Day 21   | -0.25                  | -0.55                    | 3.15      | -0.49       | 9.35      | -0.90       | 20.93     | -0.82       | 3.18      | -0.90       | -0.08     | -1.01       | 0.75      | -0.29       |
| Day 27   | 0.81                   | -0.24                    | 10.52     | -0.67       | 19.35     | -0.96       | 34.50     | -0.86       | 8.53      | -0.93       | -0.17     | -1.01       | 1.14      | -0.01       |
| Day 33   | 0.77                   | 0.15                     | 12.35     | -0.66       | 16.02     | -0.94       | 24.15     | -0.81       | 5.76      | -0.91       | -0.11     | -1.01       | 0.94      | -0.12       |

<sup>1</sup> Fold change was calculated using the formula: (RT/CCL2 of HIV-2-infected MDM – RT/CCL2 of uninfected MDM) ÷ (RT/CCL2 of uninfected MDM)

**Table S4.** Virus replication and CCL2 induction in MDM infected with HIV-2 isolates

| Donor #5 | HIV-2 B5               |                          | HIV-2 B7  |             | HIV-2 B8  |             | HIV-2 B9  |             |
|----------|------------------------|--------------------------|-----------|-------------|-----------|-------------|-----------|-------------|
|          | RT (fold) <sup>1</sup> | CCL2 (fold) <sup>1</sup> | RT (fold) | CCL2 (fold) | RT (fold) | CCL2 (fold) | RT (fold) | CCL2 (fold) |
| Day 6    | 0.63                   | -0.44                    | 4.30      | -0.55       | 0.32      | -0.67       | 1.07      | -0.81       |
| Day 12   | 13.04                  | -0.83                    | 18.51     | -0.85       | 2.90      | -0.87       | 1.94      | -0.89       |
| Day 18   | 21.98                  | -0.75                    | 10.27     | -0.71       | 4.77      | -0.85       | 2.29      | -0.70       |
| Day 24   | 10.17                  | -0.89                    | 9.62      | -0.93       | 4.52      | -0.93       | 2.19      | -0.92       |
| Day 30   | 13.85                  | -0.87                    | 13.80     | -0.92       | 6.75      | -1.01       | 3.77      | -0.94       |

<sup>1</sup> Fold change was calculated using the formula: (RT/CCL2 of HIV-2-infected MDM – RT/CCL2 of uninfected MDM) ÷ (RT/CCL2 of uninfected MDM)

**Table S5.** Virus replication and CCL2 induction in MDM infected with HIV-2 isolates

| Donor #6 | HIV-2 B2               |                          | HIV-2 B5  |             | HIV-2 B7  |             | HIV-2 B8  |             |
|----------|------------------------|--------------------------|-----------|-------------|-----------|-------------|-----------|-------------|
|          | RT (fold) <sup>1</sup> | CCL2 (fold) <sup>1</sup> | RT (fold) | CCL2 (fold) | RT (fold) | CCL2 (fold) | RT (fold) | CCL2 (fold) |
| Day 6    | -0.12                  | 0.31                     | 0.68      | 0.62        | 1.59      | 0.14        | 0.75      | 0.60        |
| Day 12   | 0.30                   | -0.13                    | 0.46      | -0.31       | 2.86      | -0.35       | 0.65      | -0.29       |
| Day 18   | 1.95                   | -0.11                    | 0.91      | 0.04        | 3.97      | -0.12       | 1.17      | -0.18       |
| Day 24   | 12.89                  | 0.02                     | 3.47      | 0.03        | 5.47      | -0.11       | 1.43      | -0.12       |
| Day 30   | 23.39                  | -0.50                    | 10.02     | -0.22       | 7.83      | -0.44       | 1.51      | -0.19       |
| Day 36   | 15.59                  | -0.60                    | 10.13     | -0.23       | 6.13      | -0.52       | 1.46      | -0.29       |
| Day 42   | 10.81                  | -0.80                    | 6.79      | -0.36       | 4.06      | -0.64       | 1.27      | -0.26       |

<sup>1</sup> Fold change was calculated using the formula: (RT/CCL2 of HIV-2-infected MDM – RT/CCL2 of uninfected MDM) ÷ (RT/CCL2 of uninfected MDM)

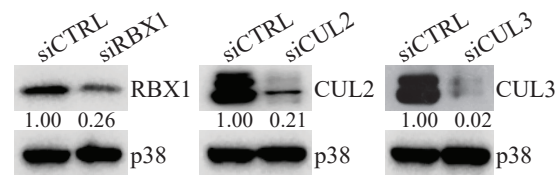

**Figure S3. Knockdown of RBX1, CUL2 and CUL3 by siRNA.** MDM were transfected with control siRNA (siCTRL), or siRNA targeting human RBX1 (siRBX1), CUL2 (siCUL2) or CUL3 (siCUL3). Cells were extracted 96 hours following the siRNA transfection. The levels of RBX1, CUL2 and CUL3 are determined by Western blotting. p38 was used as a loading control.
